# Supplementary material for: Metabolite and Transcriptome Profiles of Proanthocyanidin Biosynthesis in the Development of Litchi Fruit
Source: MDPI journal article supplement (doi:10.3390/ijms24010532), 2022-12-28
Supplement: s1 [file s1]

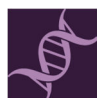

**Table S1.** qRT-PCR specific primer sequences of litchi *ANR*, *LAR* and *ANS* genes.

| qRT-PCR prime | Primer sequence (5'-3')    |
|---------------|----------------------------|
| Actin_F       | ACCGTATGAGCAAGGAAATCACTG   |
| Actin_R       | TCGTCGTA CTCAACCCTTTGAAATC |
| ANR1a_F       | CGCCACGTCCTTGATTACAG       |
| ANR1a_R       | GGAACCTAGCAGCCTCAGGA       |
| ANR1b_F       | GTTTTCCATACTGCCTCGCC       |
| ANR1b_R       | TCCACAGAACAGCAGCCATA       |
| ANR2a_F       | TGCCAATTACTGCCAGCAAA       |
| ANR2a_R       | AGATCACCATGCCTCCTAGC       |
| ANR2b_F       | AGTTGGAGACCGTTACCCTG       |
| ANR2b_R       | GCACACAAGAATCTGCCACA       |
| ANR3_F        | TGGTTGGTACTTCTTCGGCT       |
| ANR3_R        | CTCCGCATGTACAATGGCAA       |
| LAR1_F        | CCATTTTCGACCACCAAGCA       |
| LAR1_R        | GTGAATGATGCCACGATGCT       |
| LAR2_F        | GTACAGGGAAAAGCGCAGAG       |
| LAR2_R        | GTATGCTTTGACGGTGCCAT       |
| ANS1_F        | CCTTCCACGTCATCAACCAC       |
| ANS1_R        | CGAAGTAGTCCCTCCAGTCC       |
| ANS2_F        | CCTTCCACGTCATCAACCAC       |
| ANS2_R        | CGAAGTAGTCCCTCCAGTCC       |

**Table S2.** Summary information of sequencing data and mapped ratios.

| Samples  | Total Reads | GC Content | % $\geq$ Q30 | Mapped Reads        |
|----------|-------------|------------|--------------|---------------------|
| 30 DAF-1 | 41,382,120  | 46.48%     | 94.39%       | 36,851,805 (89.05%) |
| 30 DAF-2 | 37,247,892  | 48.64%     | 94.01%       | 33,618,260 (90.26%) |
| 30 DAF-3 | 43,427,130  | 46.67%     | 94.17%       | 38,883,008 (89.54%) |
| 60 DAF-1 | 35,550,750  | 48.04%     | 94.58%       | 31,806,580 (89.47%) |
| 60 DAF-2 | 37,725,280  | 47.34%     | 93.79%       | 33,535,383 (88.89%) |
| 60 DAF-3 | 41,255,920  | 46.83%     | 94.06%       | 36,643,570 (88.82%) |
| 75 DAF-1 | 37,649,738  | 46.64%     | 94.09%       | 33,621,624 (89.30%) |
| 75 DAF-2 | 38,195,216  | 46.57%     | 94.06%       | 34,058,772 (89.17%) |
| 75 DAF-3 | 42,363,658  | 46.38%     | 94.21%       | 38,030,817 (89.77%) |
| 85 DAF-1 | 37,193,802  | 46.57%     | 94.70%       | 33,157,788 (89.15%) |
| 85 DAF-2 | 37,151,122  | 46.78%     | 94.08%       | 33,078,054 (89.04%) |
| 85 DAF-3 | 37,785,300  | 46.43%     | 94.34%       | 33,515,026 (88.70%) |

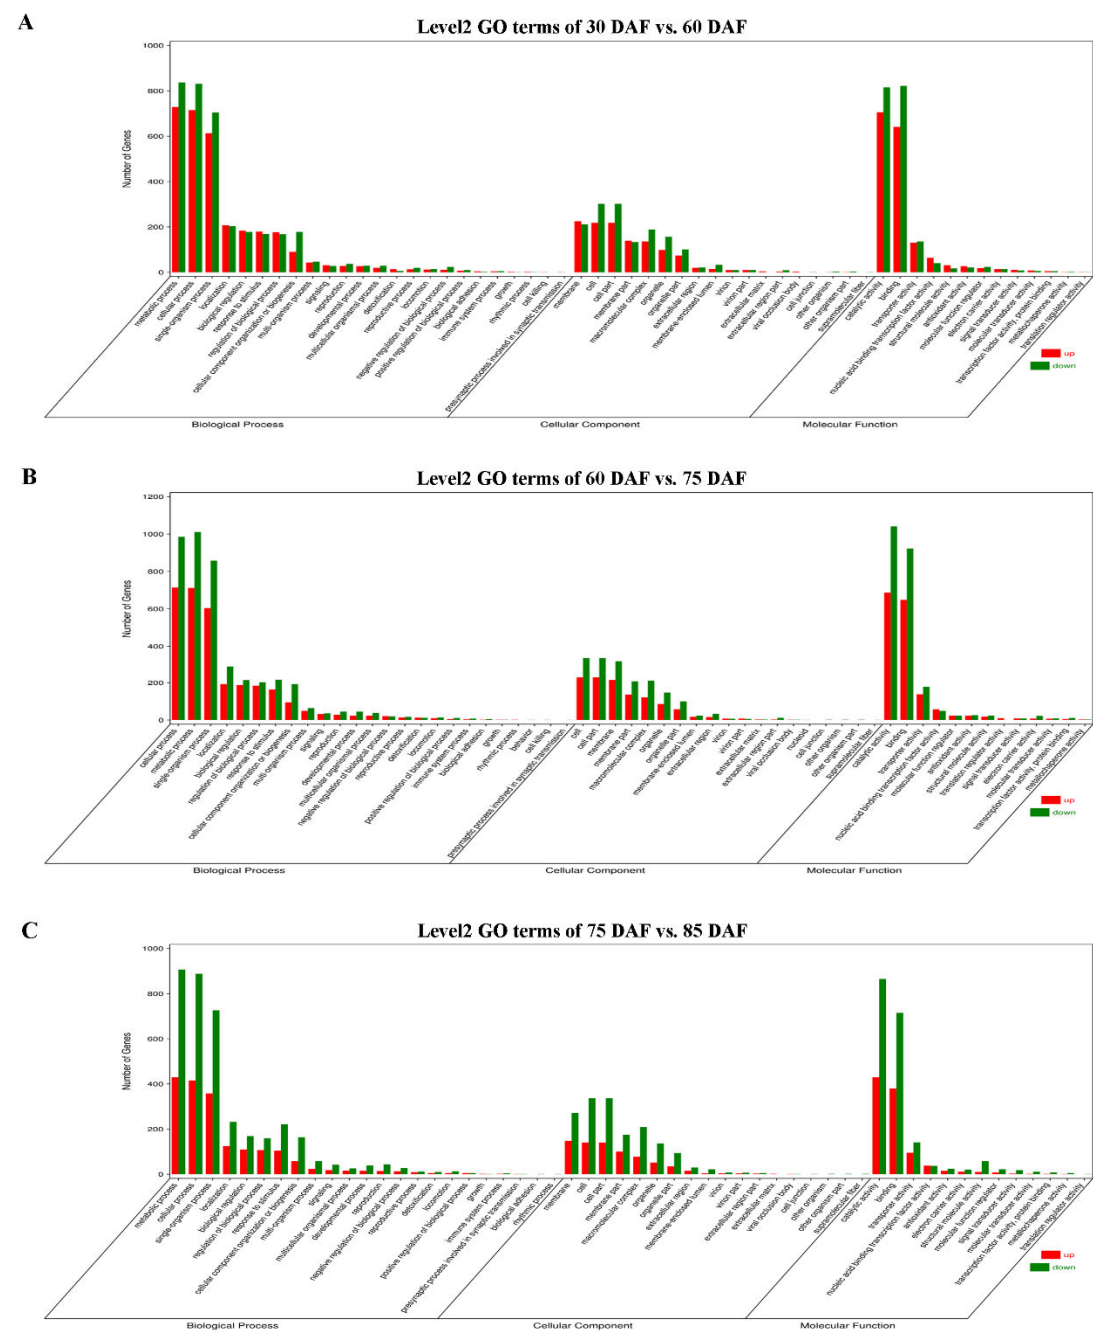

**Figure S1.** GO function of DEGs identified during litchi fruit development. (A), (B), and (C) represent the GO functions of DEGs at 30 DAF vs. 60 DAF, 60 DAF vs. 75 DAF, and 75 DAF vs. 85 DAF, respectively.

**Table S3.** Accession numbers of the sequences from various plant species used in the phylogenetic trees of ANR, LAR and ANS proteins

| Gene Name  | Gene Number                 | Latin Name        |
|------------|-----------------------------|-------------------|
| MiANR1/2/3 | MG322128/MG322129/MG322130  | Mangifera indica  |
| CsANR1/2   | KY615701/KY615702           | Camellia sinensis |
| GmANR1/2   | NM_001254984/NM_001256143.1 | Glycine max       |
| MdANR1/2   | JN035299/JN035300           | Malus domestica   |
| HvANR1/2   | AK373696/AK365124           | Hordeum vulgare   |

|                 |                           |                             |
|-----------------|---------------------------|-----------------------------|
| <i>VvANR</i>    | DQ129684                  | <i>Vitis vinifera</i>       |
| <i>AtANR</i>    | NM_104854                 | <i>Arabidopsis thaliana</i> |
| <i>MtANR</i>    | AAN77735                  | <i>Medicago truncatula</i>  |
| <i>MdLAR1/2</i> | DQ139836/DQ139837         | <i>Malus domestica</i>      |
| <i>PuLAR1/2</i> | MW928480/MW928481         | <i>Populus ussuriensis</i>  |
| <i>VvLAR1/2</i> | DQ129686/DQ13983          | <i>Vitis vinifera</i>       |
| <i>PcLAR1/2</i> | BN000698/BN000164         | <i>Phaseolus coccineus</i>  |
| <i>GrLAR1/2</i> | BN000700/BN000701         | <i>Gossypium raimondii</i>  |
| <i>CsLARA/b</i> | KY615698/KY615700         | <i>Camellia sinensis</i>    |
| <i>TcANS</i>    | ADD51356                  | <i>Theobroma cacao</i>      |
| <i>PtANS1/2</i> | XP_002298081/XM_002304416 | <i>Populus trichocarpa</i>  |
| <i>VvANS</i>    | EU156063                  | <i>Vitis vinifera</i>       |
| <i>GmANS1/2</i> | KC493686/AY382829         | <i>Glycine max</i>          |
| <i>CsANS1/2</i> | XP_028072725/XP_028087321 | <i>Camellia sinensis</i>    |
| <i>MdANS</i>    | AF117269                  | <i>Malus domestica</i>      |
| <i>NtANS1/2</i> | NP_001312972/NP_001312183 | <i>Nicotiana tabacum</i>    |
| <i>TaANS</i>    | BAE98276                  | <i>Triticum aestivum</i>    |

**Table S4.** Accession numbers of the MYB sequences from various plant species used in phylogenetic tree of MYB transcription factors in Figure 7C.

| Gene Name           | Gene Number               | Latin Name                     |
|---------------------|---------------------------|--------------------------------|
| <i>LcMYBPA1/2</i>   | LITCHI017552/LITCHI019503 | <i>Litchi chinensis</i>        |
| <i>DkMYB2/4</i>     | AB503699/AB503701         | <i>Diospyros kaki</i>          |
| <i>VvMYBPA1/2</i>   | AM259485/EU919682         | <i>Vitis vinifera</i>          |
| <i>AtTT2/AtPAP1</i> | CAC40021/AAG42001         | <i>Arabidopsis thaliana</i>    |
| <i>MdMYB1/10</i>    | ABK58136/DQ267896         | <i>Malus domestica</i>         |
| <i>SLANT1/SLAN2</i> | AAQ55181/FJ705320         | <i>Lycopersicon esculentum</i> |

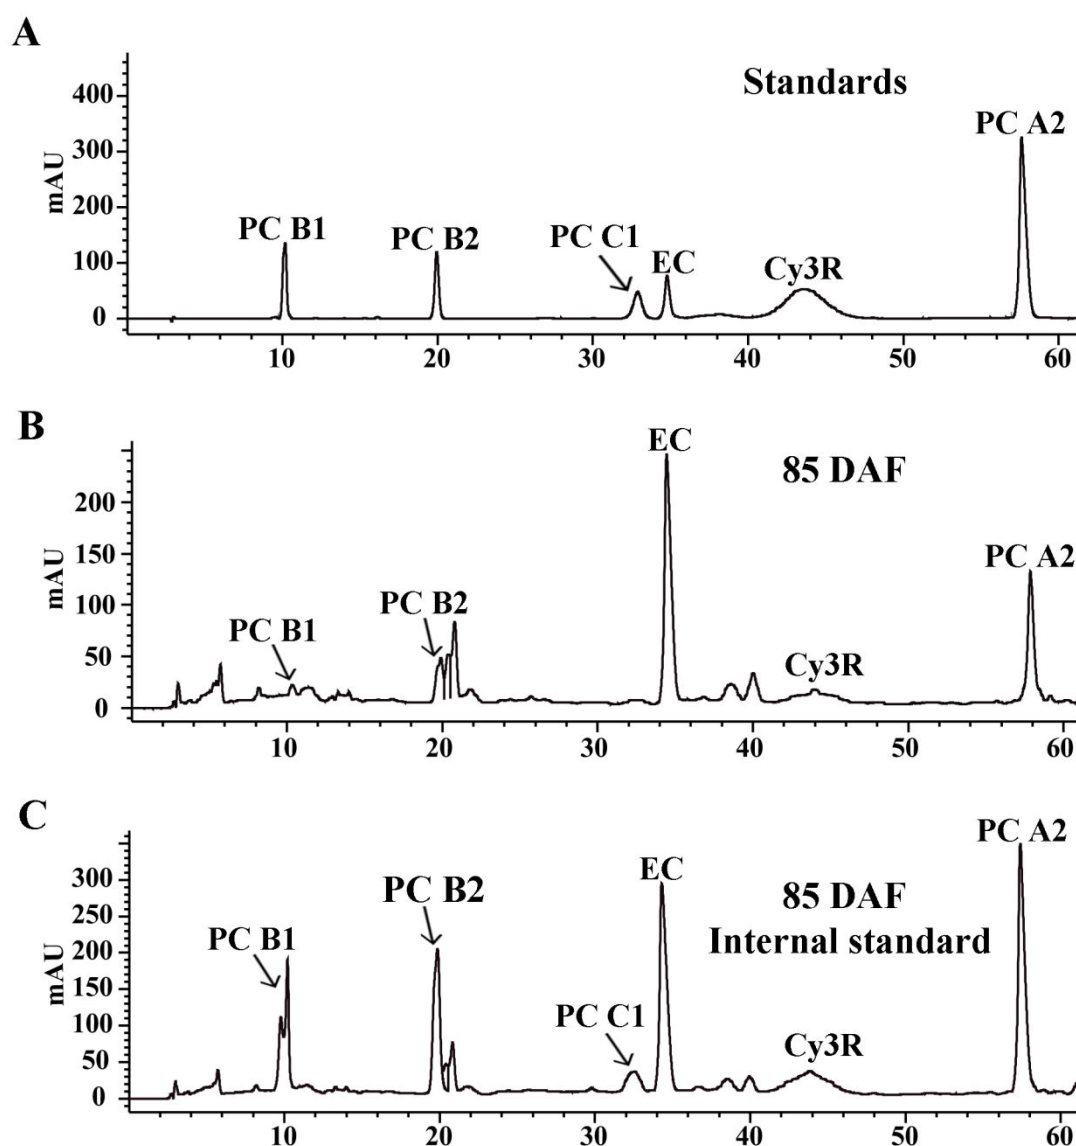

**Figure S2.** HPLC internal standard method for identification the PA substances in the soluble PA extract of litchi pericarp at 85 DAF. (A) HPLC chromatograms of mixed standards of a variety of (epi)catechin/PCs. (B) HPLC chromatograms of soluble PA extract of litchi pericarp samples at 85 DAF. (C) HPLC chromatograms of the extract in (B) with addition of mixed standards. Addition of the amount of 0.3 mg/mL of EC and PC A2/ B2, and 0.75 mg/mL of Cy3R led to increase in the respective peaks of the identified substances.

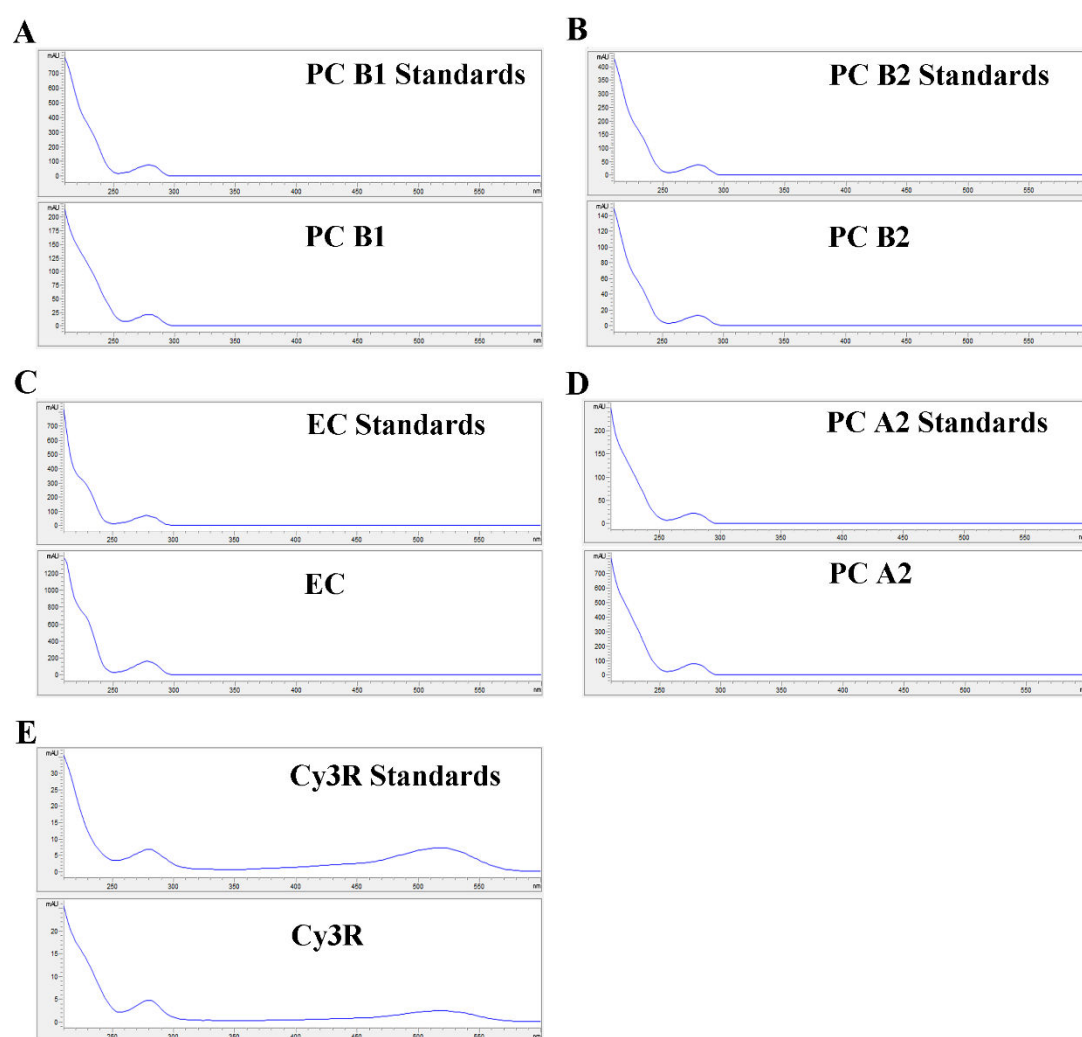

**Figure S3.** Comparison of the full absorption spectra (190- 600 nm) of the identified PAs and anthocyanin in the extracts from litchi pericarp with those of the standards. (A), (B), (C), (D) and (E), represent the full absorption spectra detected in the extract and standards of PC B1, PC B2, EC, PC A2, Cy3R , respectively.

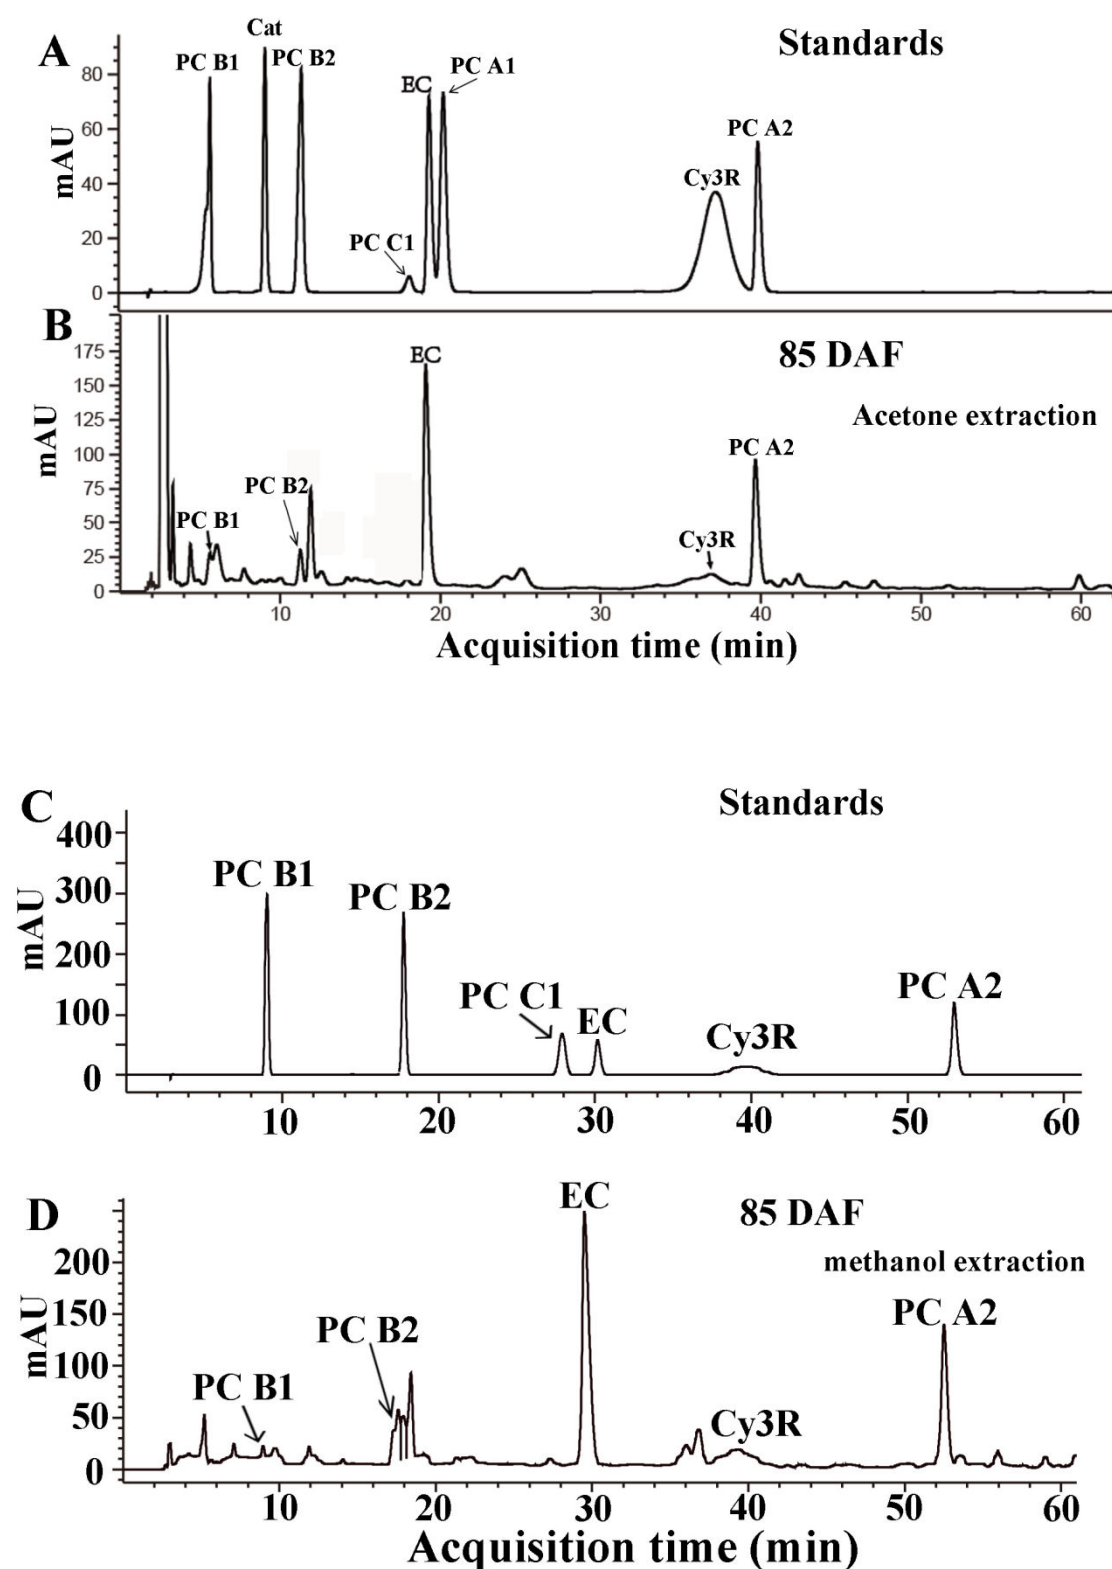

**Figure S4.** Comparison of acetone and methanol extraction for the soluble PA extract of litchi pericarp at 85 DAF. HPLC chromatograms of same mixed standards of a variety of (epi)catechin/PCs in different HPLC separation method (A, C). HPLC chromatograms of soluble PA extract of litchi pericarp samples at 85 DAF by acetone (B) and methanol extraction (D). Cat in (A) is a symbol of (+)-catechin.

**A**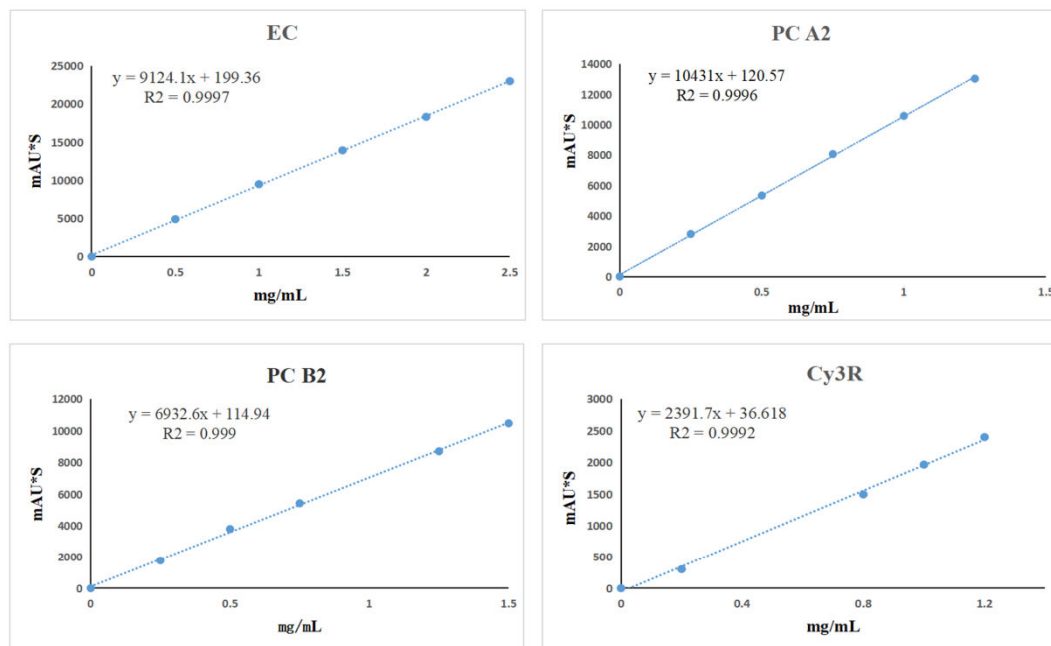**B**

| Sample | Average mAU*s |             |             |           |  |
|--------|---------------|-------------|-------------|-----------|--|
|        | EC            | PC A2       | PC B2       | Cy3R      |  |
| 30 DAF | 30741.43333   | 17087.8     | 3235.085773 | 0         |  |
| 60 DAF | 13416.63333   | 8403.06608  | 2081.58423  | 0         |  |
| 75 DAF | 9298.982097   | 6257.76253  | 1507.03284  | 881.31134 |  |
| 85 DAF | 8334.674317   | 4573.848633 | 1936.134767 | 2373.8667 |  |

**Figure S5.** The standard curves of individual PAs and Cy3R (A) and chromatographic peak area of the identified substances of litchi pericarp samples at the four stages (B).
